# Supplementary material for: Functional and Evolutionary Analyses Identify Proteolysis as a General Mechanism for NLRP1 Inflammasome Activation
Source: PubMed Central journal article supplement (PMC5142783; doi:10.1371/journal.ppat.1006052), 2016-12-07
Supplement: ppat.1006052.s005.pdf [file ppat.1006052.s005.pdf]

**Table S1. Primate NLRP1 accession numbers**

| <b>Species</b>                     | <b>Accession number</b> |
|------------------------------------|-------------------------|
| Human (full-length)                | NM_033004.3             |
| Chimpanzee (full-length)           | XM_009431692.1          |
| Gorilla (linker)                   | XM_004058386.1          |
| Orangutan (full-length)            | XM_002826912.3          |
| White-cheeked gibbon (full-length) | XM_012501543.1          |
| Mandrill (linker)                  | KX579894                |
| Drill (full-length)                | XM_011994673.1          |
| Baboon (linker)                    | XM_009189476.1          |
| Sooty mangabey (full-length)       | XM_012054373.1          |
| Pig-tailed macaque (linker)        | XM_011729025.1          |
| Crab-eating macaque (linker)       | XM_005595922.2          |
| Rhesus macaque (full-length)       | NM_001114349.1          |
| African green monkey (linker)      | XM_008010035.1          |
| Snub-nosed monkey (full-length)    | XM_010355833.1          |
| Colobus (linker)                   | XM_011958625.1          |
| Marmoset (full-length)             | XM_008997299.1          |
| Owl monkey (full-length)           | XM_012460520.1          |
| Squirrel monkey (full-length)      | XM_010341964.1          |
| Howler monkey (linker)             | KX579892                |
| Saki monkey (linker)               | KX579893                |
