# Supplementary material for: Functional and Evolutionary Analyses Identify Proteolysis as a General Mechanism for NLRP1 Inflammasome Activation
Source: PubMed Central journal article supplement (PMC5142783; doi:10.1371/journal.ppat.1006052), 2016-12-07
Supplement: ppat.1006052.s006.pdf [file ppat.1006052.s006.pdf]

**Table S2. Positively selected amino acid positions based on sequences of the NLRP1 linker region from 20 primates**

| Region | Residue<br>Number (from<br>human NLRP1) | Posterior probability |       |
|--------|-----------------------------------------|-----------------------|-------|
|        |                                         | PAML                  | FUBAR |
| Linker | 105                                     | 0.951                 |       |
| Linker | 120                                     | 0.985                 |       |
| Linker | 122                                     | 0.978                 | 0.978 |
| Linker | 139                                     |                       | 0.906 |
| Linker | 146                                     |                       | 0.943 |
| Linker | 166                                     | 0.975                 | 0.962 |
| Linker | 171                                     | 0.921                 | 0.910 |
| Linker | 187                                     | 0.939                 | 0.910 |
| Linker | 211                                     | 0.997                 | 0.940 |
| Linker | 292                                     | 0.918                 |       |
| Linker | 293                                     | 0.961                 | 0.961 |
| Linker | 298                                     | 0.975                 | 0.974 |
