# Supplementary material for: Functional and Evolutionary Analyses Identify Proteolysis as a General Mechanism for NLRP1 Inflammasome Activation
Source: PubMed Central journal article supplement (PMC5142783; doi:10.1371/journal.ppat.1006052), 2016-12-07
Supplement: ppat.1006052.s007.pdf [file ppat.1006052.s007.pdf]

**Table S3. Positively selected amino acid positions based on whole gene sequences of NLRP1 from 11 primates**

| Region | Residue Number (from human NLRP1) | Posterior probability |       |
|--------|-----------------------------------|-----------------------|-------|
|        |                                   | PAML                  | FUBAR |
| Linker | 105                               | 0.963                 |       |
| Linker | 120                               | 0.938                 |       |
| Linker | 122                               | 0.931                 |       |
| Linker | 166                               | 0.927                 |       |
| Linker | 211                               | 0.991                 |       |
| Linker | 293                               | 0.956                 | 0.910 |
|        | 501                               | 0.940                 |       |
|        | 569                               | 0.985                 |       |
|        | 652                               | 0.918                 |       |
|        | 680                               | 0.902                 |       |
|        | 729                               | 0.974                 |       |
|        | 762                               | 0.966                 | 0.910 |
| LRR    | 834                               | 0.910                 |       |
| LRR    | 891                               | 0.991                 | 0.957 |
| LRR    | 893                               | 0.974                 |       |
| LRR    | 912                               | 0.917                 |       |
| LRR    | 923                               | 0.972                 |       |
| LRR    | 937                               | 0.904                 |       |
| LRR    | 961                               | 0.918                 |       |
|        | 991                               | 0.987                 | 0.963 |
|        | 995                               | 0.976                 | 0.927 |
|        | 1016                              | 0.971                 | 0.937 |
|        | 1052                              | 0.979                 | 0.954 |
|        | 1059                              | 0.951                 |       |
|        | 1356                              | 0.975                 |       |
|        | 1366                              | 0.964                 | 0.939 |
| CARD   | 1398                              | 0.961                 | 0.913 |
| CARD   | 1443                              | 0.939                 | 0.934 |
