# Supplementary material for: Functional and Evolutionary Analyses Identify Proteolysis as a General Mechanism for NLRP1 Inflammasome Activation
Source: PubMed Central journal article supplement (PMC5142783; doi:10.1371/journal.ppat.1006052), 2016-12-07
Supplement: ppat.1006052.s008.pdf [file ppat.1006052.s008.pdf]

**Table S4 Oligonucleotide sequences used for PCR amplification or site directed mutagenesis.**

| NLRP1B        | Sequence                                                                                     | Short oligo name     |
|---------------|----------------------------------------------------------------------------------------------|----------------------|
| 1             | tataCTCGAGgccacc ATG TACCCATACGACGTCCCAGACTACGCT GAACAATCTCAGCCC                             | B6 NLRP1-XhoI-HA     |
| 2             | atatGCGGCCGC TCA GGATCCCAAAGAGACCC                                                           | B6 NLRP1-R-stop-NotI |
| 3             | atatGCGGCCGCt ATGTACCCATACGACGTCC                                                            | GFP-HA-F-NotI        |
| 4             | GCAGACCAAG GAGAACCTGTATTTTCAGGGC<br>GGGACAATTCCAAAAGTACACATAAAAC                             | B6-N1b-TEV3-F        |
| 5             | CTTTTGAATTGTCCGccctgaaaatacaggttctcCTTGGGTCTGCGCTTCATCAGC                                    | B6-N1b-TEV3-R        |
| 6             | AGAGCTGAAGCACAGACCCAAG ccc GAG ggg CACTTGAAGCTAGGAATGATTCCAGTAG                              | 129-B6-A-F           |
| 7             | GGAATCATTCCTAGCTTCAAGTGcccCTCgggCTTGGGTCTGTGCTTCAGCTCTACATTC<br>CTAGAGAGACACTTGAAGCTAGGA acc | 129-B6-A-R           |
| 8             | ATTCCAGTAGTATATATGAAGCAGGGAGAAGAG                                                            | 129-B6-B-F           |
| 9             | CTCCCTGCTTCATATATACTACTGGAATggfTCCTAGCTTCAAGTGTCTCTCTAGCTTGG<br>CCCAGGGGCACTTGAAGCTAGGA acc  | 129-B6-B-R           |
| 10            | ATTCCAGTAGTATATATGAAGCAGGGAGAAGAG                                                            | 129-B6-C-F           |
| 11            | CTCCCTGCTTCATATATACTACTGGAATggfTCCTAGCTTCAAGTGCCCCCTCGGGCTTGG                                | 129-B6-C-R           |
| 12            | GACCCgcGCTAGAGAGACACTTG gcG CTAGGAATGATTCAGTAGTATATATGAAGCAGG                                | N1b-K38A-K44A-F      |
| 13            | TATATACTACTGGAATCATTCTAGCgcCAAGTGTCTCTCTAGCgcGGGTCTGTGCTTC                                   | N1b-K38A-K44A-R      |
| 14            | atatCTCGAGgccaccATG CTAGAGAGACACTTGAAGCTAGG                                                  | N1b-L39-XhoI-F       |
| 15            | atatCTCGAGgccaccATG CTA GGAATGATTCAGTAGTATATATGAAGC                                          | L45-XhoI             |
| 16            | atatCTCGAGgccaccATG GGAATGATTCAGTAGTATATATGAAGC                                              | G46-start-xhoI       |
| 17            | atatGCGGCCGCTCAAGCGTAGTCTGGGACGTCG                                                           | HA-stop-NotI-R       |
| 18            | CTGCTGGGATTGGG Aga TCt AACTG GCCAGGCTGGTG                                                    | Nlrp1b-K137R-F       |
| 19            | CAGCCTGGCCAGTGTaGAtcTCCCAATCCCAGCAGCCC                                                       | Nlrp1b-K137R-R       |
| <b>NLRP1A</b> |                                                                                              |                      |
| 20            | gcatat GGATCC gccacc ATGGAAGAATCTCAGTCCAAGCAGG                                               | NLRP1A-BamHI-F       |
| 21            | gcatatGCGGCCGCcTTTCACAGAGACCCCAACCAAC                                                        | NLRP1A-NotIinostop-R |
| 22            | atCTCGAGgccaccATG TACCCATACGACGTCCCAGACTACGCT<br>GAAGAATCTCAGTCCAAGCAGG                      | HA-NLRP1A-XhoI-F     |
| 23            | ggcatGCGGCCGC TCA GGATTCACAGAGACCCCAAC                                                       | NLRP1A-stop-NotI-R   |
| 24            | GGGTGCCAACTAAAG ACT CTG TGG CTTGTTGAATGCGGCCTCACATCCACATAC                                   | NLRP1A-exonAdel-F    |
| 25            | ATGTGAGGCCGATTCAACAAGCCACAGAGCTTTAGTTGGCAGCCACGC                                             | NLRP1A-exonAdel-R    |
| 26            | TGAAGCAGCAGAGACAGCAGTCA GGAGACAAACACATGGAACCTCTGGGG                                          | NLRP1A-exonBdel-F    |
| 27            | GAGGTTCCATGTGTTTGTCTCCTGACTGCTGTCTCTGCTGCTTCAGTAGG                                           | NLRP1A-exonBdel-R    |
| 28            | GGT GATCTCAGACCTGCACTGC CCAAGATTGCTACAGCCCCC                                                 | NLRP1A-SOE           |
| 29            | GGGGGCTGTAGCAATCTTGGGCAGTGCAGGTCTGAGATCACC                                                   | NLRP1A-SOE           |
| 30            | GCAGTGCAGGTCTGAGATCACCTGGTTTCAGCAAGGCCTCCC                                                   | NLRP1A-C' ext3       |
| 31            | gcagtgacaatagagatcgaattctgtgcc                                                               | Nalp1b Seq4          |
| 32            | TGAAGCACAGAGTgCAG gag AAC CTG TAT TTT CAG ggc<br>AGAACCTTCCAGGAGCACGTAC                      | NP1A-TEV3-F2         |
| 33            | TCCTGGAAAGGTTCTgccCTGAAAATACAGGTTctcCTGcACTCTGTGCTTCATTAGCTCC                                | NP1A-TEV3-R2         |
| <b>hNLRP1</b> |                                                                                              |                      |
| 34            | gctataGGTACC gccacc ATGGCTGGCGGAGCC                                                          | hNLRP1-F-KpnI-Kzk    |
| 35            | gctata CTCGAG GCTGCTGAGTGGCAGGAG                                                             | hNLRP1-R-noStop-XhoI |
| 36            | GCTGCTACTTCTACAAAAGACCTCACCCAGAAGCCAAGATCCCCTGG                                              | hNP1 C1414T-F        |
| 37            | GGGATCTTGGCTTCTGGGGTGAGGTCTTTGTAGAAGTAGCAGCTGTGTG                                            | hNP1 C1414T-R        |
| 38            | CCTCAAGTCCACCAGAAACCTCAGCTGCTCATCTCAGC                                                       | hNP1-dLRR2-F         |
| 39            | GAAGATGAGCAGCTGAGGGTTTCTGGTGACCTTGAGGACG                                                     | hNP1-dLRR2-R         |
| 40            | gctata GGTACC gccaccATG ACCCAATGCCTCTGG                                                      | hNP1-PC1             |
| 41            | CGGGCTGGAGGGATCAGAGTAGTTGCAGGCATGAGATCTCCTGGTTTCACCAAGGCCTCC                                 | hNP1-R-Nt-SOE        |
| 42            | CTACTCTGATCCCTCAGCCCC CATAG CCGTACCTTCACCTCTGGATGCC                                          | hNP1-F-Ct-SOE        |
| 43            | GGGCTGCTGGAATTGGG gcG TCAACTGGCCAGGCAGGTGAAGGAAG                                             | hNLRP1-WalkerA-K-A-F |

|    |                                                                 |                      |
|----|-----------------------------------------------------------------|----------------------|
| 44 | CTTCACCTGCCTGGCCAGTGTGACgcCCCAATTCAGCAGCCCCCTGC                 | hNLRP1-WalkerA-K-A-R |
| 45 | GGGCTGCTGGAATTGGG agG TCAACACTGGCCAGGCAGGTGAAGGAAG              | hNLRP1-WalkerA-K-R-F |
| 46 | CTTCACCTGCCTGGCCAGTGTGAcctCCCAATTCAGCAGCCCCCTGC                 | hNLRP1-WalkerA-K-R-R |
| 47 | GCGCCCAAGCCAGGAA AACCTGTATTTTCAGGGC TCATTCCCCTACAGCCCAAGTG      | hNP1 TEV2-F          |
| 48 | GGGCTGTAGGGGAATGAGCCCTGAAAATACAGGTTTCTGGGCTGGGGCGCACAGTG        | hNP1- TEV2 R         |
| 49 | CCTAGCACCCAGA GAG aac ctg tat ttt cag ggc CAATGGCCTCTGGATGAAACG | hNP1-Tev1-F          |
| 50 | CCAGAGGCCATTG gcc ctg aaa ata cag gtt CTCTCTGGGTGCTAGGCTGG      | hNP1-TEV1-R          |
| 51 | atatGCGGCCGct ATGGCTGGCGGAGCCTGGGG                              | GFP-notI FL-hNP1     |
| 52 | atatGCGGCCGct CCCTCATTCCTACAGCCC                                | GFP-notI-dPYD        |
| 53 | atatGCGGCCGct GAA AACCTGTATTTTCAGGGC TCATTCC                    | GFP-notI-dPYD-T2     |
| 54 | atatGCGGCCGct GAG aac ctg tat ttt cag ggc CAA                   | GFP-notI-d198-T1     |
| 55 | tgcgat GTCGAC TTAATTCAGATCCTCTCTGAGATGAGT                       | MYC-stop-SalI-R      |
| 56 | ATCTTCCCAATTGCTGAGATTGCA GAGGAAAGCTCCCCAGAGGTAGTACC             | hNLRP1-del GKSH-F    |
| 57 | TACCTCTGGGGAGCTTCTCTGCAATCTCAGCAATTGGGAAGATCTTGC                | hNLRP1-del GKSH-R    |
| 58 | CCGCTGGCCTGTTACTTGG                                             | pNLRP1 fwd           |
| 59 | GACAGGATCTGTCTAATGGGAGCC                                        | pNLRP1 rev           |

**Other genes**

|    |                                             |                     |
|----|---------------------------------------------|---------------------|
| 60 | gcataat GGATCC gccacc ATGGCAGAAGTACCTGAGCTC | hIL1b-F-BamHI       |
| 61 | gcataatGCGGCCGccGGAAGACACAAATTGCATGGTG      | hIL1b-R-nostop-NotI |
